# Supplementary material
Source: PubMed Central journal article supplement (PMC5317018)
Supplement: DS_10.1177_0706743716670129.pdf [file DS_10.1177_0706743716670129.pdf]

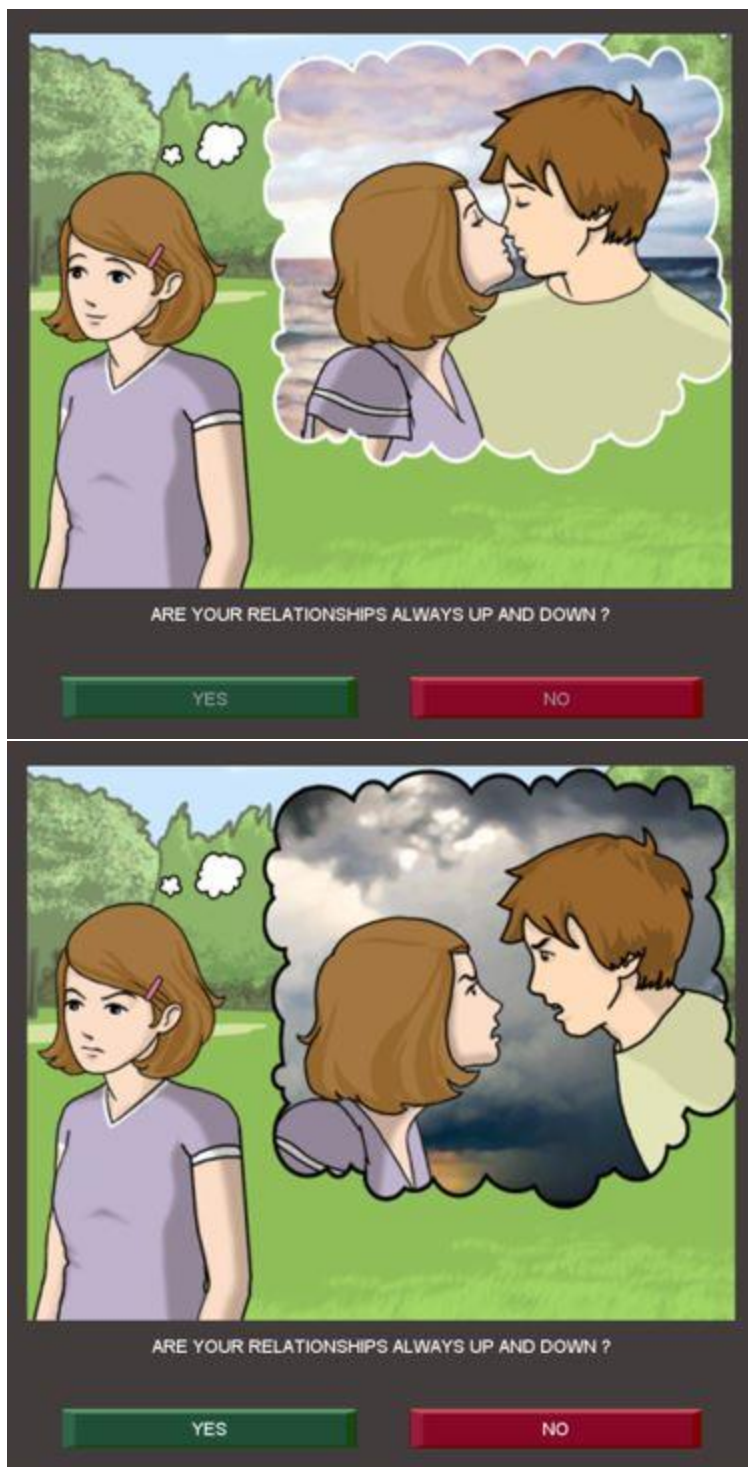

**Figure 1.** Items included in the DIA-R Borderline Trait Scale (girl version).

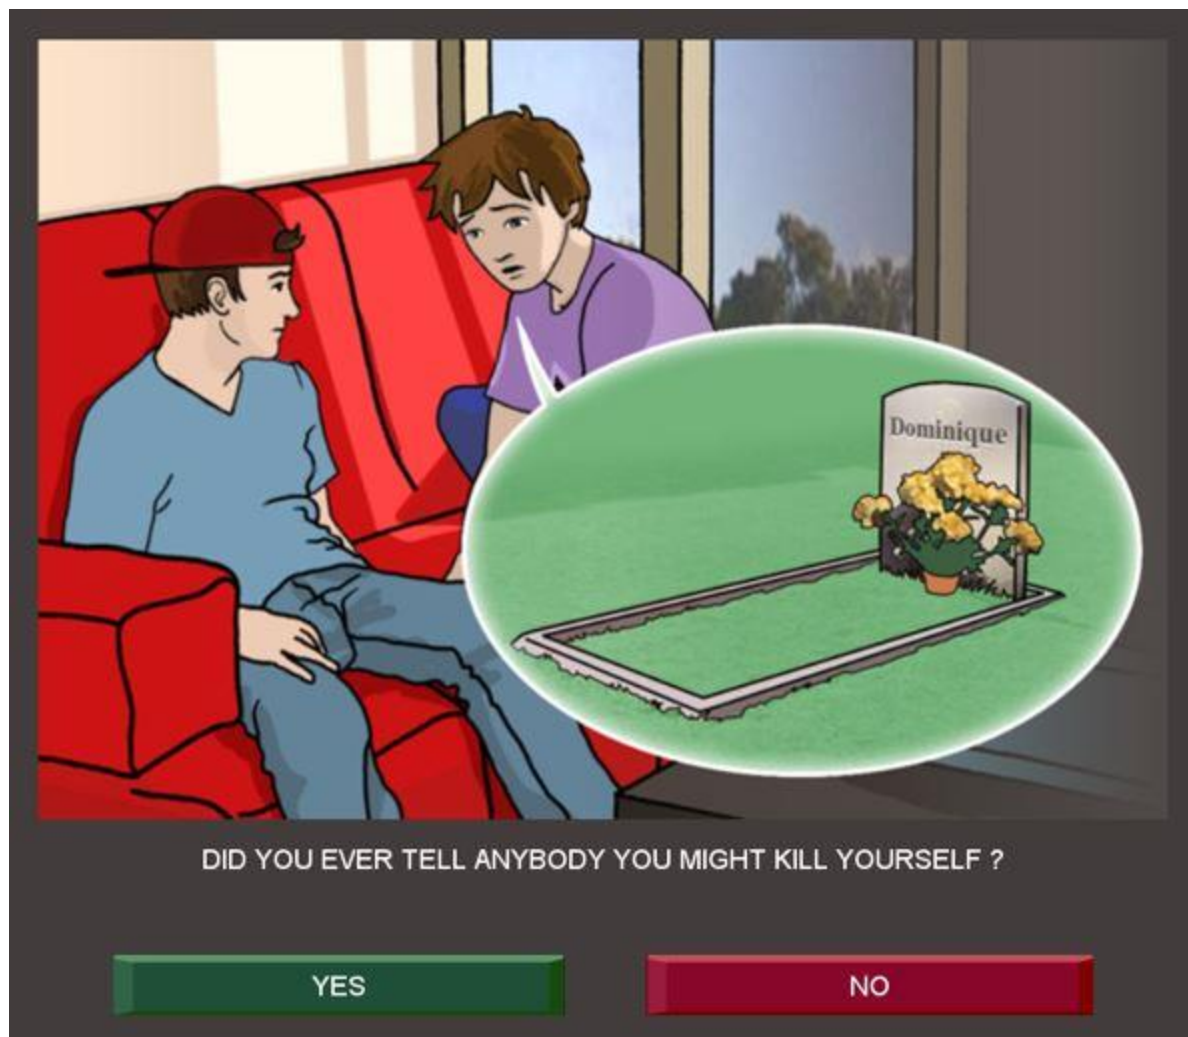

**Figure 2.** Item included in the DIA-R Suicidality Scale (boy version).
